# Supplementary material for: Improvement of drought tolerance by overexpressing MdATG18a is mediated by modified antioxidant system and activated autophagy in transgenic apple
Source: PubMed Central journal article supplement (PMC5787838; doi:10.1111/pbi.12794), 2017-08-22
Supplement: PBI-16-545-s001.pdf [file PBI-16-545-s001.pdf]

1 Supplemental data

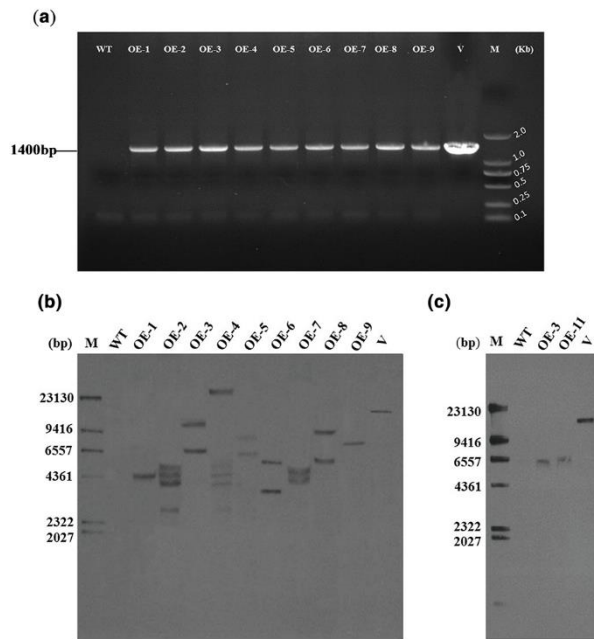

2

3

4 Fig. S1 Southern blot of *MdATG18a* transgenic lines of tomato and apple. Young  
5 tomato and apple leaves samples were collected at normal growth condition. (a) PCR  
6 with DNA of nine tomato transgenic lines. Lanes: WT, wild type ‘Micro-Tom’ plants;  
7 OE-1~9, nine transgenic lines; V, positive vector containing pCambia2300-*MdATG18a*  
8 plasmid; M, molecular marker DL2000. (b) Southern blot of tomato transgenic lines.  
9 Lanes: M, Maker; WT, wild type ‘Micro-Tom’ plants; OE-1~9, nine transgenic lines;  
10 V, positive vector containing pCambia2300-*MdATG18a* plasmid. (c) Southern blot of  
11 apple transgenic lines. Lanes: M, Maker; WT, non-transformed wild-type; OE-3 and -  
12 11, *MdATG18a*-transgenic lines; V, positive vector containing pCambia2300-  
13 *MdATG18a* plasmid.

14

15
